# Supplementary material for: Expression of Genes for a Flavin Adenine Dinucleotide-Binding Oxidoreductase and a Methyltransferase from Mycobacterium chlorophenolicum Is Necessary for Biosynthesis of 10-Methyl Stearic Acid from Oleic Acid in Escherichia coli
Source: PubMed Central journal article supplement (PMC5660069; doi:10.3389/fmicb.2017.02061), 2017-10-23
Supplement: Image_1.pdf [file Image_1.pdf]

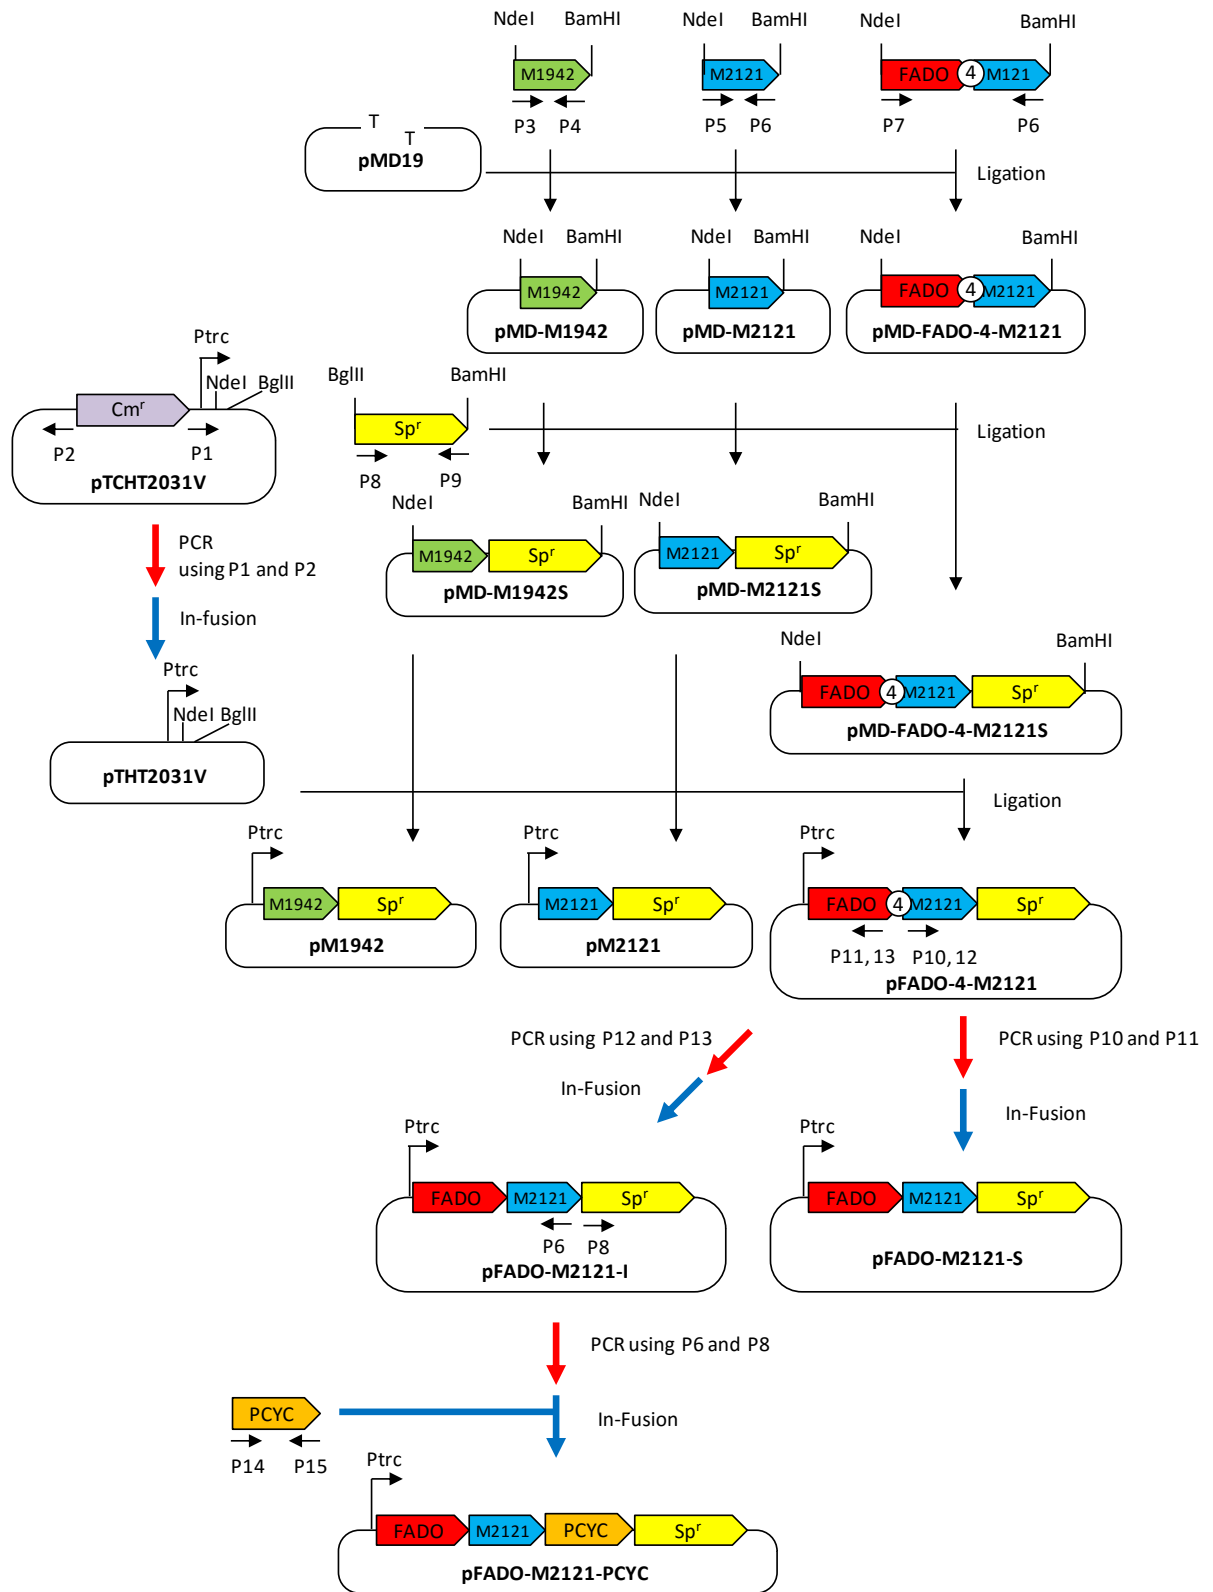

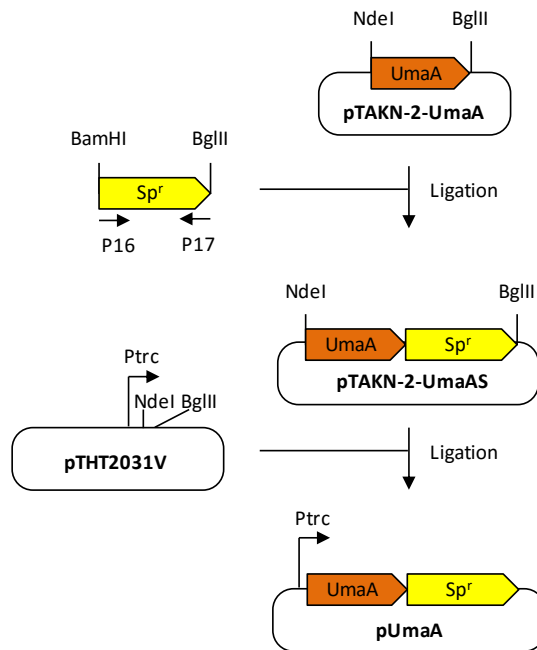

### Supplementary Figure 1. Construction of the plasmid

Scheme of the engineered DNA fragment for expression in *E. coli*. The fragments encoding WP\_048471942, WP\_048472121, flavin adenine dinucleotide (FAD)-binding oxidoreductase, and polyketide cyclase were amplified from *Mycobacterium chlorophenolicum* and the target genes were expressed under the control of the *trc* promoter. M1942, WP\_048471942; M2121, WP\_048472121 (BfaB); FADO, FAD-binding oxidoreductase; PCYC, polyketide cyclase. The number “4” in the circle indicates the overlap of 4 base pairs between the two tandem genes.
