# Supplementary material for: Expression of Genes for a Flavin Adenine Dinucleotide-Binding Oxidoreductase and a Methyltransferase from Mycobacterium chlorophenolicum Is Necessary for Biosynthesis of 10-Methyl Stearic Acid from Oleic Acid in Escherichia coli
Source: PubMed Central journal article supplement (PMC5660069; doi:10.3389/fmicb.2017.02061), 2017-10-23
Supplement: Image_3.pdf [file Image_3.pdf]

A. FAD-binding oxidoreductases

```

R_eryth      1  -----MGFEQHRREGVVERLLASYRAIPADASVRLAKK
R_qingsh    1  -----MGFEQHRREGVVERLLASYRAIPADASVRLAKK
R_ruber     1  -----MOKPKSVVVPSCSAHRAQVERLLRSYRAIPADAPVRLAKK
N_donost    1  -----MSLLGKAGHPAAYESGFAAVRACVSRLLLESYRAIPAGADVRLAKK
M_chloro    1  -----MSVPATDARAHAHADQVERLLASYRAIPFGATVRLAKP
M_tuber     1  -----MQGQLSRTRVYTPVPGSAQSAAYACQVERLLASYRIPATASIRLAKP
C_urealy    1  MVGDMTVLGALKNIAVETVGTKTTDALRIGNGLDARELOPVGWFAGHGOAVEKLRASYRAIPFGENVRLAKK
A_orient    1  -----MASGDGGPRATARLVRFAEHEARADALRAQLAGLHG--TIRLAKR

R_eryth     32  TSNLFRARAKTSAPGLDVSGLAGVIAVDAQAHTADVAGMCTYEDLV DATLPYGLAPLVVPOLKTTITLGA
R_qingsh    32  TSNLFRARAKTSAPGLDVSGLAGVIAVDAQAHTADVAGMCTYEDLV DATLPYGLAPLVVPOLKTTITLGA
R_ruber     42  TSNLFRARARVNAPGLDVSGLCGVVAVDPVARTADVAGMCTYEDLV DATLPYGLAPLVVPOLKTTITLGA
N_donost    47  TSNLFRARARNTAPGLDVSGLTQVIAVDPVARTADVAGMCTYEDLV DATLPYGLAPLVVPOLKTTITLGA
M_chloro    38  TSNLFRARAKSTAPGLDVSGLTQVIAVDPVARTADVAGMCTYEDLV DATLPYGLAPLVVPOLKTTITLGA
M_tuber     49  TSNLFRARVHHDARGLDASCLTGVIQDPEARTADVAGMCTYEDLV DATLPYGLAPLVVPOLKTTITLGA
C_urealy    71  TSNLFRGRNOSTTPGLDVSGLCGVIAVDPVAGTADVAGMCTYEDLV DATLPYGLAPLVVPOLKTTITLGA
A_orient    44  TSNLFRARATSTPGLDVSGFTTHVLDVDPVARTADVAGMCTYEDLV DATLPYGLAPLVVPOLKTTITLGA

R_eryth     102  VTCLGIESTSRFNGLPHESVLEIDVLTCSGEIITATPDGEHAE LFFGFPNSYGTLCYSTRLKIALEPVVK
R_qingsh    102  VTCLGIESTSRFNGLPHESVLEIDVLTCSGEIITATPDGEHAE LFFGFPNSYGTLCYSTRLKIALEPVVK
R_ruber     112  VTCLGIESTSRFNGLPHESVLEMDILTCAGEIVTATPDGEHADLFHGFNPSTYGTLCYSTRIRKIELEPVKP
N_donost    117  VTCLGIESTSRFNGLPHESVLEIDVLTCSGEIIVTATPDGEHADLFHGFNPSTYGTLCYSTRLKIELEPVKP
M_chloro    108  VTCLGIESASFRNGLPHESVLEMDILTCAGDVVVTRASP-TEHPDLPHAFNPSTYGTLCYSTRLKIELEPVKP
M_tuber     119  VTCLGIESASFRNGLPHESVLEMDILTCAGELLTVSP-CGHSDLRYRFPNSYGTLCYSTRIRKIELEPVKP
C_urealy    141  VTCLGVESACFRNGLPHESVLEMDILTCAGEVVTCSF-TONVDFLFRGFPNAYGSLGYAVRLKIELEPVKD
A_orient    114  VTCLGIESASFRNGLPHESVLEMDILTCAGRIVVARADNHSDFLHGFNPSTYGTLCYSTRIRKIELEPVKP

R_eryth     172  YVALRHVRFDSLKKLEETMDRIVTEREYDGIADVYLDGVVFDSESYLTGVTQDTEGCPVSDYTDODIYY
R_qingsh    172  YVALRHVRFDSLKKLEETMDRIVTEREYDGIADVYLDGVVFDSESYLTGVTQDTEGCPVSDYTDODIYY
R_ruber     182  YVALRHVRFDDLDEMOSAMDRIATERVHAGVVDYLDGVVFSATESYLTGVTQDTEGCPVSDYTGEBIYY
N_donost    187  YVALRHVRFHDLGEEAALTRIVTERDHDGERVDYLDGVVFSAGESYLTGVTQDTEGCPVSDYTGMDIYY
M_chloro    177  YVALRHVRFHADLIEAMDRIETGCHNGERVDYLDGVVFSADESYLTGVTQDTEGCPVSDYTGODIYY
M_tuber     188  YVALRHVRFSSILTAMVAMERIDTGCGLDGEVDYLDGVVFSADESYLTGVTQDTEGCPVSDYTGODIYY
C_urealy    210  YVELRHVRFHDVHALTEVMEQIETGCEVDEAVDYLDGVVFSLEECYLMGVTQDTEGCPVSDYTRDRIYY
A_orient    184  YVRLDHVRFDDTEEFYALGAEACRTG----AADEFVDCVTFVGPGEQYLTGVTFTTSAPATSDYTWLDIYY

R_eryth     242  RSIQHPSLTQPKTDRLTIRDYLWRWDTDFWFCRAFCAQNPKIRRFWPKOYLRRSSFYWKLIALDHRKYDYG
R_qingsh    242  RSIQHSSLTOPKTDRLTIRDYLWRWDTDFWFCRAFCAQNPKIRRFWPKOYLRRSSFYWKLIALDHRKYDYG
R_ruber     252  RSIQHASNPNPPTDRLTIRDYLWRWDTDFWFCRAFCAQNPKIRRFWPKOYLRRSSFYWKLIALDHRKYDYG
N_donost    257  RSIQHEGCG-TPKHDRLTIRDYLWRWDTDFWFCRAFCAQNPKIRRFWPKOYLRRSSFYWKLIALDHRKYDYG
M_chloro    247  RSIQHPSG--EKHDRLTIRDYLWRWDTDFWFCRAFCAQNPKIRRFWPKOYLRRSSFYWKLIGYDORFDIA
M_tuber     258  RSIQHEAG--IKEDRLTIRDYLWRWDTDFWFCRAFCAQNPKIRRFWPKOYLRRSSFYWKLIALDHRKYDYG
C_urealy    280  RSIQHPSG--VLRDRLSIRDYLWRWDTDFWFCRAFCAQNPKIRRFWPKOYLRRSSFYWKLIGWDRKYDYG
A_orient    249  RSIQRETS--DHLSDYLDYLWRWDTDFWFCRAFCAQNPKIRRFWPKOYLRRSSFYWKLIALDHRKYDYG

R_eryth     312  DRLEKRRKGRPPRERVVQDIEVPIERTADPVSWFLEEIPIEPLWLCPLRLR-----EPSPAASA
R_qingsh    312  DRLEKRRKGRPPRERVVQDIEVPIERTADPVSWFLEEIPIEPLWLCPLRLR-----EPSPAASA
R_ruber     322  DRLEKRRKGRPPRERVVQDIEVPIERTADPVSWFLEEIPIEPLWLCPLRLR-----EGGPAARDA
N_donost    326  DRLEKRRKGRPPRERVVQDIEVPIERTADPVSWFLEEIPIEPLWLCPLRLR-----RTG--SGGS
M_chloro    315  DRLEKRRKGRPPRERVVQDIEVPIERTADPVSWFLEEIPIEPLWLCPLRLR-----DAPNS
M_tuber     326  DRFENSRCRPPRERVVQDIEVPIERTADPVSWFLEEIPIEPLWLCPLRLR-----DHAG-
C_urealy    348  DRIEAANNRPPRERVVQDIEVPIERTADPVSWFLEEIPIEPLWLCPLRLR-----GTGADGNELVGEGETLQADK
A_orient    314  AKILKLRGCPPEETIVQDIEVPIERTADPVSWFLEEIPIEPLWLCPLRLR-----PG

R_eryth     371  SRPWPLYPLPDKRRTYVNIQFWSVPIVPCGER--EGANRLIEEKVSDFDGCHKSLYSDSYYSKEDFEELY
R_qingsh    371  SRPWPLYPLPDKRRTYVNIQFWSVPIVPCGER--EGANRLIEEKVSDFDGCHKSLYSDSYYSKEDFEELY
R_ruber     381  QRPWPLYPLPDKRRTYVNIQFWSVPTVAGEI---EGANRRIEEKVSDFDGCHKSLYSDSYYSKEDFEELY
N_donost    383  ARPWPLYPLPDKRRTYVNIQFWSVPIVPCGER--EGANRLIEEKVSDFDGCHKSLYSDSYYSKEDFEELY
M_chloro    370  TGGWPLYPLPDKRRTYVNIQFWSVPIVPCGER--EGYTRNRIEKVSDFDGCHKSLYSDSYYSKEDFEELY
M_tuber     380  ---WPLYPLPDKRRTYVNIQFWSVPIVPCGER--EGANRRIEEKVSDFDGCHKSLYSDSYYSKEDFEELY
C_urealy    418  EHPWPLYPLPDKRRTYVNIQFWSVPIVPCGER--EGANRRIEEKVSDFDGCHKSLYSDSYYSKEDFEELY
A_orient    366  GVNSPLYPLPDKRRTYVNIQFWSVPIVPCGER--PDTNRLIEEKVSDFDGCHKSLYSDSYYSKEDFEELY

R_eryth     438  YGGDRYICLKERIDPKSRLLDLFSKAVORK
R_qingsh    438  YGGDRYICLKERIDPKSRLLDLFSKAVORK
R_ruber     448  YGGDYPTLKKRYDPKSRLLDLFSKAVORK
N_donost    450  GG-DDYIICLKKRYDPKSRLLDLFSKAVORK
M_chloro    435  GG-EVYTTVKKIYDPDSRLLDLYAKAVORK
M_tuber     442  GG-ETVNTVKKIYDPDSRLLDLYAKAVORK
C_urealy    488  GG-SFPAOLNEVIDPGRFPGLYEKTVDWA
A_orient    433  NG-DAYRRLKTAIDPDGRLLDLYAKAVORK

```

## B. SAM-dependent methyltransferases

```

M_chloro 1 MTTFRERPTDAANPADGRLLTAEILEIFASG-TRPLNFTAYDGSAGPDAAALGLDLTFRGTTYLATAP
M_tuber 1 -----MAEILEIFATGQHPLNFTAYDGSTAGQDATALGLDLRTPRGATYLATAP
R_eryth 1 -MTTFKDSK----SOD-KLSIAEILEIFSDG-MLPLRFTAYDGSAGPDDADYGLHLSKSTRGTTYLATAP
R_qingsh 1 -MTTFKDSK----SOD-KLSIAEILEIFSDG-MLPLRFTAYDGSAGPDDADYGLHLSKSTRGTTYLATAP
R_ruber 1 -MTTLREPR---TPDGRLLTAAQILEITVGG-ELPVRFTAYDGSAGPTDAPYGLRLNSTRGTTYLATAP
N_donost 1 -MTTFRERSDVFADLGTLSIAEIFDITVVDG-EIPVRFTAYDGSATGPADSEFALDIRNARGINYLATAP
A_orient 1 -----MAETTVVGGKIFERLLGP-STEVSITAYDGSAGPADAPVSIQVRSPLALTYIMSSP
C_urealy 1 -----MTVAEIVEAITAP-PLPFHVTFGFDGSETGPADARLRRLDITSSDALAYEVTAP

M_chloro 70 GDLCGLARAYISGNLEAHGVHPGDPYELLNALTETE--KLDKFRPSARVLAQVIRSLG-VEHLKPIISPPPOEA
M_tuber 51 GDLGLARAYVSGDLEAHGVHPGDPYELLNALTETE--RVDFKFRPSARVLAVVRSIG-VEHILPIAPPPPOEA
R_eryth 64 GDLCGLARAYVSGDLEAHGVHPGDPYELLNALTETE--SLHKKRPSALTLASITRSLG-WDLLRPIAPPPPOEH
R_qingsh 64 GDLCGLARAYVSGDLEAHGVHPGDPYELLNALTETE--SLHKKRPSALTLASITRSLG-WDLLRPIAPPPPOEH
R_ruber 65 GDLCGLARAYVSGDLEAHGVHPGDPYELLNALTETE--DLHFQRPALTLAQIARSLG-LETLKPIAPPPPOEH
N_donost 69 GDLCGLARAYVSGDLEAHGVHPGDPYELLNALTETE--DLKFRPSALALTLIARSLG-WEHLRPIAPPPPOET
A_orient 56 GDLCGLARAYVACALDVEDLYTALRALVAQVDD--LSTADR-----LWLLRELG-PRHLRRVAPPPEEL
C_urealy 52 GDLCGLARAYVTCALOVSCENPCHFYGMFDALQTFYYESFRKPSAATCARIARSLKHLDAIRPMPPIPPQED

M_chloro 137 LPRWRRFAEG--LRHSKTRDAEAIHHHYDVSNTFYEVVLGPSMTYTCAVYOHPE-----
M_tuber 118 LPRWRRFAEG--LRHSKTRDAEAIHHHYDVSNTFYEVVLGPSMTYTCAVFPNAE-----
R_eryth 131 LPRWRRFAEG--LRHSKTRDAEVIHHHYDVSNTFYEVVLGPSMTYTCAVDNAE-----
R_qingsh 131 LPRWRRFAEG--LRHSKTRDAEVIHHHYDVSNTFYEVVLGPSMTYTCAVDNAE-----
R_ruber 131 LPRWRRFAEG--LRHSKTRDAEVIHHHYDVSNTFYEVVLGPSMTYTCAVDFSEA-----
N_donost 135 LPRWRRFAEG--LRHSKTRDAEAIHHHYDVSNTFYEVVLGPSMTYTCAVYOHPE-----
A_orient 117 PSRAKRVFDC--LRHSKTRDAEAIHHHYDVSNTFYEVVLGPSMTYTCAVYOHPE-----
C_urealy 122 QFGWKKALFEGLSRHSRBRDKKVVQRHYDVCNDLYELFLGDSMTYTCAVYOHPE-----

M_chloro 189 ---ATLEEAQENKYRLVFEKLRLOPGDRLLDVGCGGGMVRYAARRC-VTAIGVTLSEQAQWAKIAE
M_tuber 170 ---ASLEQAQENKYRLVFEKLRLEPGDRLLDVGCGGGMVRYAARRC-VRVIGVTLSEQAQWAKIAE
R_eryth 183 ---QTLLEEAQENKYRLVFEKLRLOPGDRLLDVGCGGGMVRYAARRC-VKVIQVTLSEQAQWAKIAE
R_qingsh 183 ---QTLLEEAQENKYRLVFEKLRLOPGDRLLDVGCGGGMVRYAARRC-VKVIQVTLSEQAQWAKIAE
R_ruber 183 ---QSLLEEAQENKYRLVFEKLRLOPGDRLLDVGCGGGMVRYAARRC-VKAIQVTLSEQAQWAKIAE
N_donost 187 ---WTLLEEAQENKYRLVFEKLRLEPGDRLLDVGCGGGMVRYAARRC-VQAIQVTLSEQAQWAKIAE
A_orient 169 ---ASLEEAQAHKFDLVCRLDLKPKGRLLDVGCGGGMVRYAARRC-VQAIQVTLSEQAQWAKIAE
C_urealy 192 AVKEFLDRAQENKYRLVFEKLRLEPGDRLLDVGCGGGMVRYAARRC-VKAIQVTLSEQAQWAKIAE

M_chloro 255 EGLGDLAEVRHSDYRDVRESEFQDAVSSIGLTHEIGVGNYPAYFRFLKSKLRTGCLLNHCITRPNDRHGA
M_tuber 236 EGLGDLAEVRHSDYRDVRESEFQDAVSSIGLTHEIGVGNYPAYFRFLKSKLRTGCLLNHCITRPNDRHGA
R_eryth 249 EGLADLAQVRFSDYRDVRESEFQDAVSSIGLTHEIGVGNYPAYFRFLKSKLRTGCLLNHCITRPNDRSSA
R_qingsh 249 EGLADLAQVRFSDYRDVRESEFQDAVSSIGLTHEIGVGNYPAYFRFLKSKLRTGCLLNHCITRPNDRSSA
R_ruber 249 EGLADLAQVRFSDYRDVRESEFQDAVSSIGLTHEIGVGNYPAYFRFLKSKLRTGCLLNHCITRPNDRSPV
N_donost 253 EGLGDLAEVRHSDYRDVRESEFQDAVSSIGLTHEIGVGNYPAYFRFLKSKLRTGCLLNHCITRPNDRGT
A_orient 236 KGLADRAEVRHSDYRDVRESEFQDAVSSIGLTHEIGVGNYPAYFRFLKSKLRTGCLLNHCITRPNDRVPH
C_urealy 261 QGLEEFARLMDYRDVRESEFQDAVSSIGLTHEIGVGNYPAYFRFLKSKLRTGCLLNHCITRPNDRERIN

M_chloro 325 AAGGFIDRYVFPDGELTCSGRIITEVQDVGLVVRHEENLRNHYAMTTRDWNRRNLVHWDVAEAVGLATA
M_tuber 306 AAGGFIDRYVFPDGELTCSGRIITEVQDVGLVVRHEENLRNHYAMTTRDWCNGLVHWDVAEAVGLATA
R_eryth 319 AAGGFIDRYVFPDGELTCSGRIITEVQDVGLVVRHEENLRNHYALTLAGWCNGLVHWDVAEAVGLATA
R_qingsh 319 AAGGFIDRYVFPDGELTCSGRIITEVQDVGLVVRHEENLRNHYALTLAGWCNGLVHWDVAEAVGLATA
R_ruber 319 AAGGFIDRYVFPDGELTCSGRIITEVQDVGLVVRHEENLRNHYALTLAGWCNGLVHWDVAEAVGLATA
N_donost 323 AAGGFIDRYVFPDGELTCSGRIITEVQDVGLVVRHEENLRNHYALTLAGWCNGLVHWDVAEAVGLATA
A_orient 306 AAGGFIDRYVFPDGELTCSGRIITEVQDVGLVVRHEENLRNHYALTLAGWCNGLVHWDVAEAVGLATA
C_urealy 331 AAGGFIDRYVFPDGELTCSGRIITEVQDVGLVVRHEENLRNHYALTLAGWCNGLVHWDVAEAVGLATA

M_chloro 395 RVWGLYMACSRVAFERNNQLHQLVAVKLDKGRDGGIPLRPWWTA
M_tuber 376 RVWGLYMACSRVAFERNNQLHQLVAVKLDKGRDGGIPLRPWWQF
R_eryth 389 RVWGLYMACSRVAFERNNQLHQLVAVKLDKGRDGGIPLRPWWKA
R_qingsh 389 RVWGLYMACSRVAFERNNQLHQLVAVKLDKGRDGGIPLRPWWKA
R_ruber 389 RVWGLYMACSRVAFERNNQLHQLVAVKLDKGRDGGIPLRPWWIA
N_donost 393 RVWGLYMACSRVAFERNNQLHQLVAVKLDKGRDGGIPLRPWWQF
A_orient 376 RVWGLYMACSRVAFERNNQLHQLVAVKLDKGRDGGIPLRPWWGV
C_urealy 400 RVWGLYMACSRVAFERNNQLHQLVAVKLDKGRDGGIPLRPWWES

```

**Supplementary Figure 3. Alignments of amino acid sequences of homologous proteins of FAD-binding oxidoreductase WP\_048472120 and SAM-dependent methyltransferase WP\_048472121**

**A.** Amino acid sequences of homologous proteins of FAD-binding oxidoreductase WP\_048472120. R\_eryth, WP\_019746543 of *Rhodococcus erythropolis* R138; R\_qingsh, WP\_007731548 of *Rhodococcus qingshengii* BKS 20-40; R\_ruber, WP\_003935378 of *Rhodococcus ruber* BKS 20-38; N\_donost, WP\_077118793 of *Nocardia donostiensis* X 1654; M\_chloro, WP\_048472120 of *Mycobacterium chlorophenolicum* JCM 7439; M\_tuber, WP\_003917236 of *Mycobacterium tuberculosis* H37Rv; C\_urealy, WP\_012359407 of *Corynebacterium urealyticum* ATCC 43042; A\_orient, WP\_037303122 of *Amycolatopsis orientalis* DSM 40040. **B.** Amino acid sequences of homologous proteins of SAM-dependent methyltransferase WP\_048472121. M\_chloro, WP\_048472121 of *Mycobacterium chlorophenolicum* JCM 7439; M\_tuber, WP\_003420415 of *Mycobacterium tuberculosis* H37Rv; R\_eryth, WP\_019746542 of *Rhodococcus erythropolis* R138; R\_qingsh, WP\_003943932 of *Rhodococcus qingshengii* BKS 20-40; R\_ruber, WP\_003935379 of *Rhodococcus ruber* BKS 20-38; N\_donost, WP\_077118797 of *Nocardia donostiensis* X 1654; A\_orient, WP\_037303124 of *Amycolatopsis orientalis* DSM 40040; C\_urealy, WP\_012359408 of *Corynebacterium urealyticum* ATCC 43042. Inserted sequences in *C. urealyticum* ATCC 43042 were indicated by red underlines.
